# Supplementary material for: A high-performance spectrally-selective solar absorber based on a yttria-stabilized zirconia cermet with high-temperature stability
Source: Royal Society of Chemistry journal article supplement (doi:10.1039/c5ee02066b), 2015-01-01
Supplement: c5ee02066b1.pdf [file c5ee02066b1.pdf]

Electronic Supplementary Information (ESI):

## **High-Performance Spectrally-Selective Solar Absorber Based on Yttria-Stabilized Zirconia Cermet with High-Temperature Stability**

Feng Cao,<sup>‡a</sup> Daniel Kraemer,<sup>‡b</sup> Lu Tang,<sup>a</sup> Yang Li,<sup>c</sup> Alexander P. Litvinchuk,<sup>a</sup> Jiming Bao,<sup>c</sup> Gang Chen<sup>\*b</sup> and Zhifeng Ren<sup>\*a</sup>

*<sup>a</sup> Department of Physics and TcSUH, University of Houston, Houston, Texas 77204, USA. E-mail: [zren@uh.edu](mailto:zren@uh.edu)*

*<sup>b</sup> Department of Mechanical Engineering, Massachusetts Institute of Technology, Cambridge, Massachusetts 02139, USA. E-mail: [gchen2@mit.edu](mailto:gchen2@mit.edu)*

*<sup>c</sup> Department of Electrical and Computer Engineering, University of Houston, Houston, Texas 77204, USA*

<sup>‡</sup> Authors contributed equally to this work.

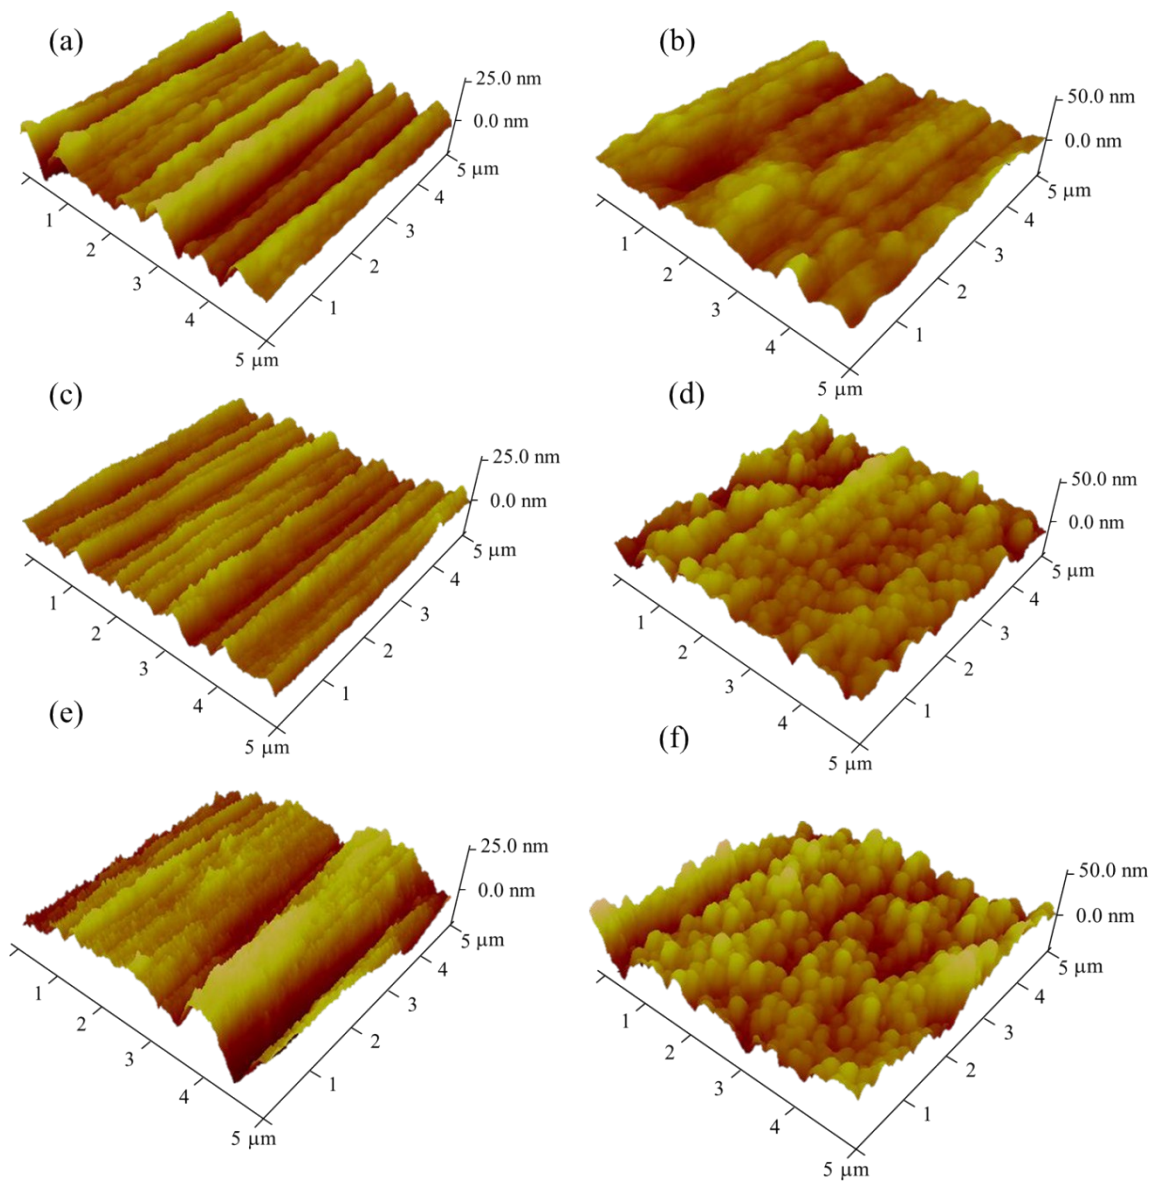

**Fig. S1** AFM images of single YSZ coating deposited on stainless steel substrates with zero oxygen partial pressure before (a) and after (b) annealing, 0.2 mTorr oxygen partial pressure before (c) and after (d) annealing, and 0.375 mTorr oxygen partial pressure before (e) and after (f) annealing at 600 °C for 7 days.
